# Supplementary material for: Development and Feasibility of a Kinect-Based Constraint-Induced Therapy Program in the Home Setting for Children With Unilateral Cerebral Palsy
Source: Frontiers journal article supplement (doi:10.3389/fbioe.2021.755506), 2021-10-26
Supplement: Presentation_1.PDF [file Presentation_1.PDF]

## Supplementary Material

### 1 Appendix A: The gameplay questionnaire

| Part A. The Smileyometer rating questionnaire                                   |                                                                                             |                 |
|---------------------------------------------------------------------------------|---------------------------------------------------------------------------------------------|-----------------|
| Items                                                                           | Score<br> |                 |
| 1. Did you feel happy when playing this game?                                   | Happy _____                                                                                 | _____ Unhappy   |
| 2. Did you love this game?                                                      | Like _____                                                                                  | _____ Dislike   |
| 3. Did you feel you were good at this game?                                     | Good _____                                                                                  | _____ Not good  |
| 4. Was this game difficult for you?                                             | Easy _____                                                                                  | _____ Difficult |
| 5.1. Did you feel tired while playing the game? ( <b>Right</b> upper extremity) | Tired _____                                                                                 | _____ Not tired |
| 5.2. Did you feel tired while playing the game? ( <b>Left</b> upper extremity)  | Tired _____                                                                                 | _____ Not tired |

|                                                                                                      |                                                                                                                                                                                                                                                                                                                                                                                                                         |
|------------------------------------------------------------------------------------------------------|-------------------------------------------------------------------------------------------------------------------------------------------------------------------------------------------------------------------------------------------------------------------------------------------------------------------------------------------------------------------------------------------------------------------------|
| 6. Do you want to play this game again?                                                              | <div style="display: flex; justify-content: space-between;"> <span>Want</span> <span>Do not want</span> </div> <hr/>                                                                                                                                                                                                                                                                                                    |
| 7. Do you want to play this game at home?                                                            | <div style="display: flex; justify-content: space-between;"> <span>Want</span> <span>Do not want</span> </div> <hr/>                                                                                                                                                                                                                                                                                                    |
| <b>Part B. Interview</b>                                                                             |                                                                                                                                                                                                                                                                                                                                                                                                                         |
| 8. What is the feeling when you are playing this game?                                               | <div style="display: flex; justify-content: space-around; text-align: center;"> <span>Exciting</span> <span>Funny</span> <span>Interesting</span> <span>Beatiful</span> <span>Ugly</span> </div> <div style="display: flex; justify-content: space-around; text-align: center;"> <span>Childlike</span> <span>Surprise</span> <span>Boring</span> <span>Excellent</span> <span>Dull</span> <span>Confused</span> </div> |
| 9. Are you feel safe when you are playing this game? (e.g., afraid of falling down the chair)        |                                                                                                                                                                                                                                                                                                                                                                                                                         |
| 10. What is the most difficult task in this game?                                                    |                                                                                                                                                                                                                                                                                                                                                                                                                         |
| 11. Do you have any questions or anything you are not understood during gameplay?                    |                                                                                                                                                                                                                                                                                                                                                                                                                         |
| 12. Do you have any rehabilitative treatments usually? What's the training of rehabilitation you do? |                                                                                                                                                                                                                                                                                                                                                                                                                         |
| 13. Which rehabilitative tasks are more interesting to you? Why?                                     | <input type="checkbox"/> The Kinect-based upper limb motor training system<br><input type="checkbox"/> The regular rehabilitative training<br><br>Reason:                                                                                                                                                                                                                                                               |

14. Do you prefer to do the training of the Kinect program or regular rehabilitation? Why?

- ☐ The Kinect-based upper limb motor training system
- ☐ The regular rehabilitative training

Reason:
